# Supplementary figures and images for: qtcm 0.1.2: a Python implementation of the Neelin-Zeng Quasi-Equilibrium Tropical Circulation Model
Source: Copernicus journal article supplement (doi:10.5194/gmd-2-1-2009), 2009-02-11

JL obtained from NZ directory

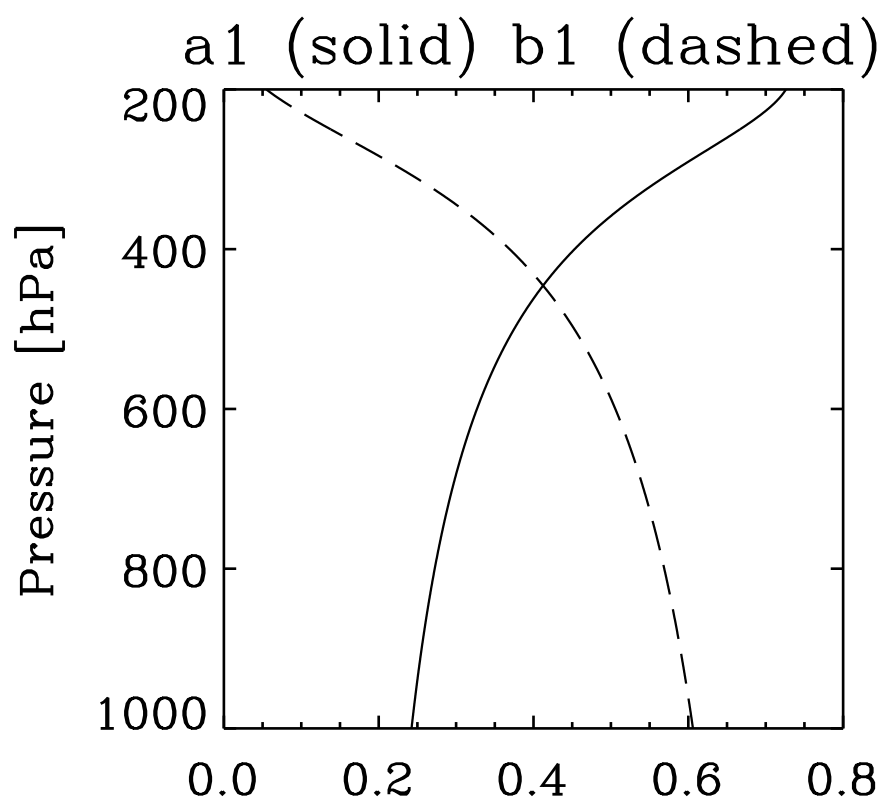

Supplement: Supplementary file 1 [file gmd-2-1-2009-supplement.zip]

JL obtained from NZ directory

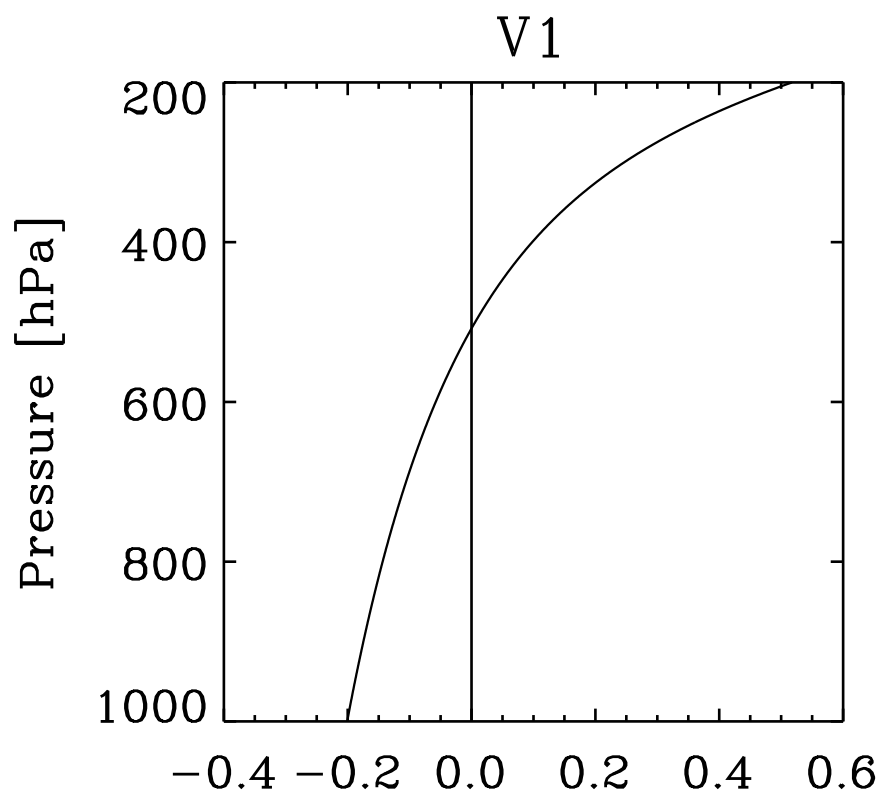

Supplement: Supplementary file 2 [file gmd-2-1-2009-supplement.zip]
